# Supplementary material for: Has COVID-19 Affected DTP3 Vaccination in the Americas?
Source: MDPI journal article supplement (doi:10.3390/vaccines12030238), 2024-02-25
Supplement: s1 [file s1]

## SUPPLEMENTARY MATERIAL

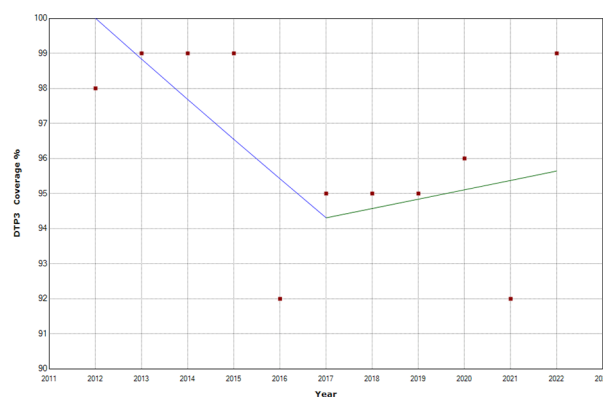

**Figure S1.** Joinpoint graph of DTP3 in Antigua and Barbuda (2012-22).

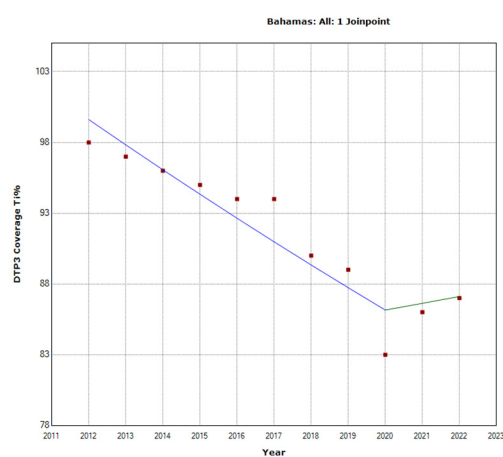

**Figure S2.** Joinpoint graph of DTP3 in the Bahamas. (2012-22).

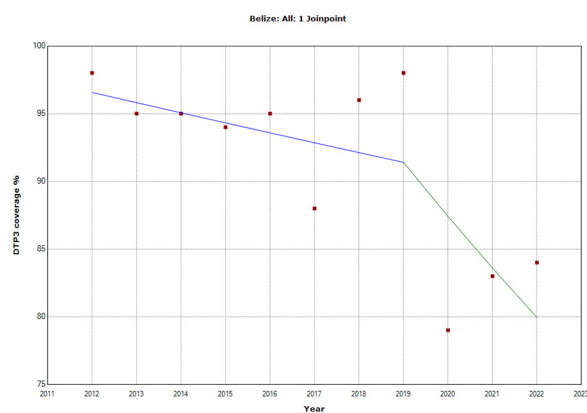

**Figure S3.** Joinpoint graph of DTP3 in Belize. (2012-22).

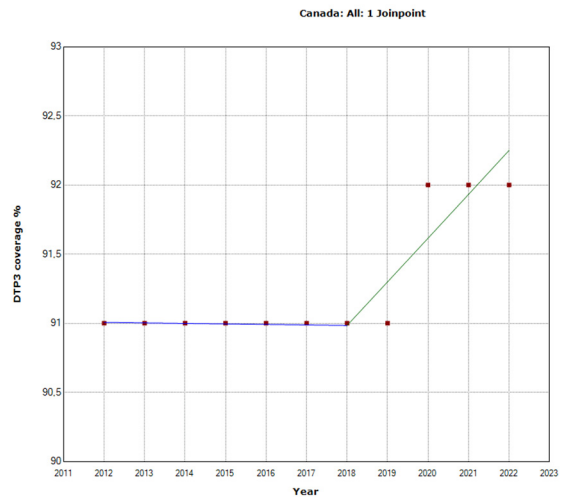

Figure S4. Joinpoint graph of DTP3 in Canada (2012-22).

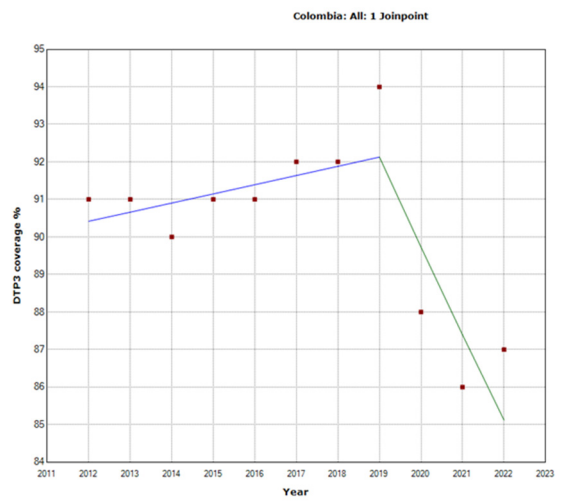

Figure S5 Joinpoint graph of DTP3 in Colombia (2012-22).

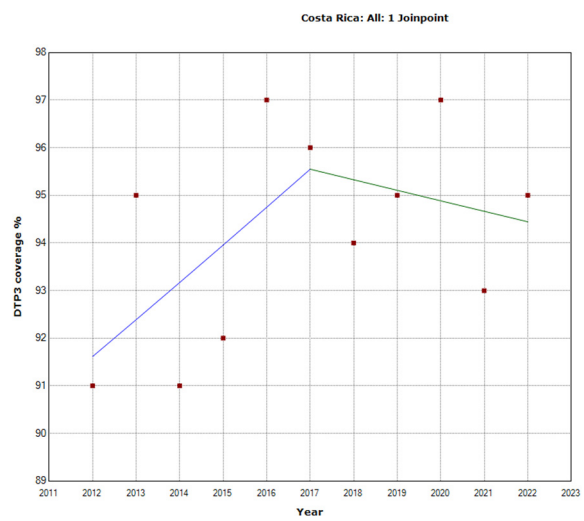

Figure S6. Joinpoint graph of DTP3 in Costa Rica (2012-22).

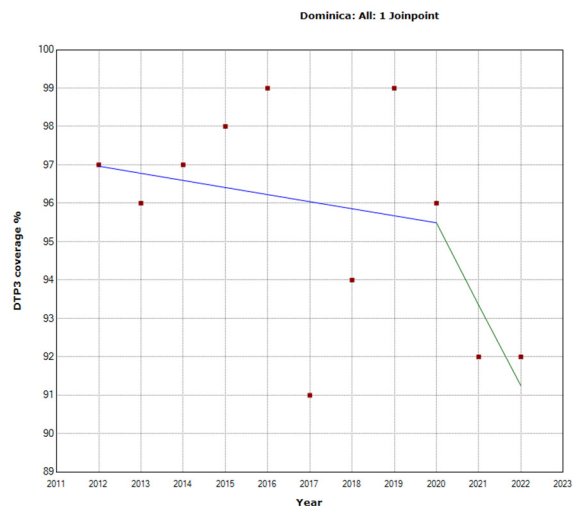

**Figure S7.** Joinpoint graph of DTP3 in Dominica (2012-22).

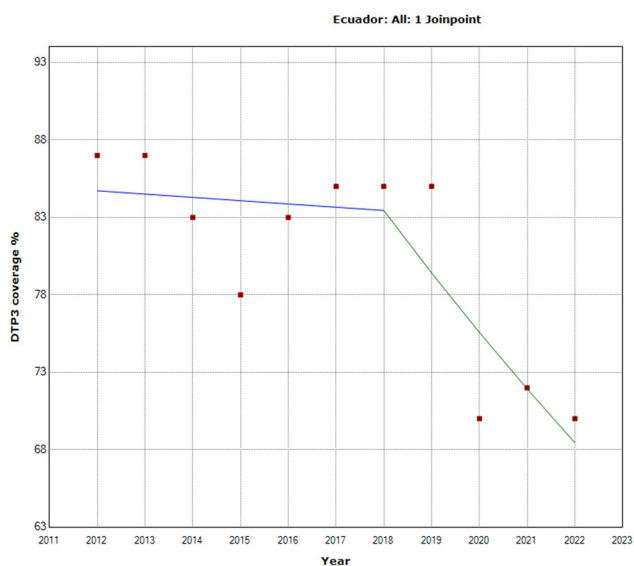

**Figure S8.** Joinpoint graph of DTP3 in Ecuador (2012-22).

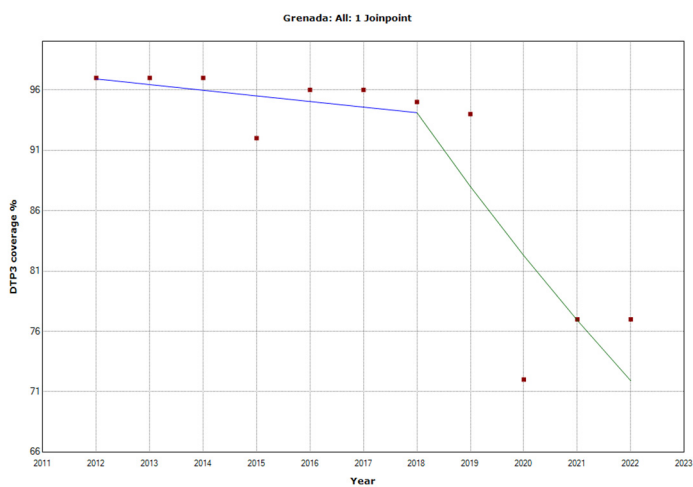

**Figure S9.** Joinpoint graph of DTP3 in Grenada (2012-22).

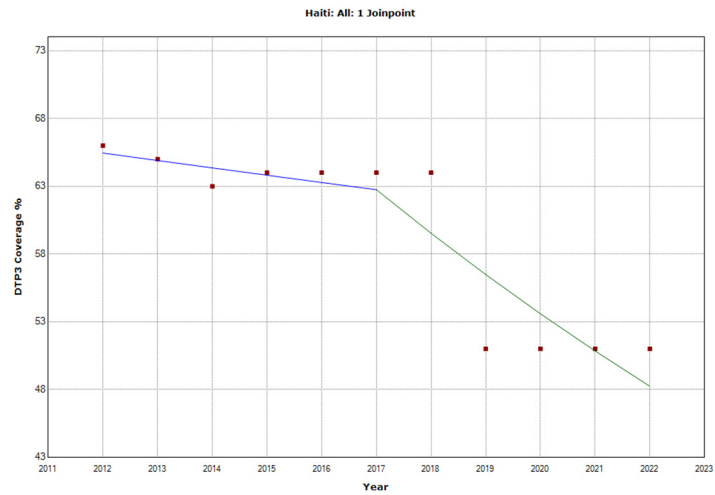

**Figure S10.** Joinpoint graph of DTP3 in Haiti (2012-22).

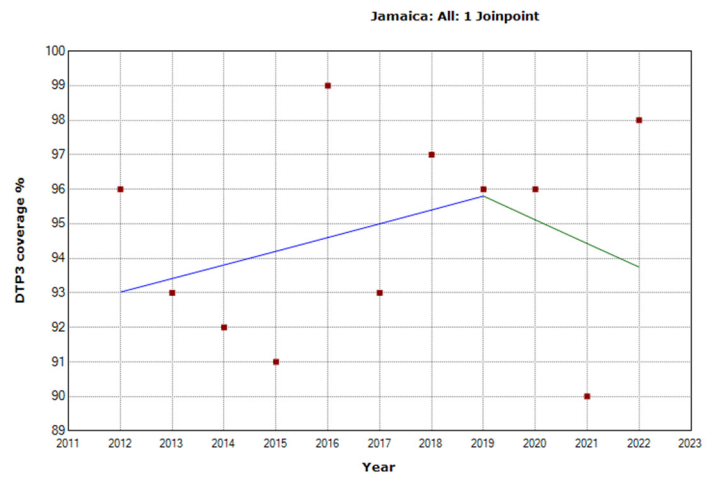

**Figure S11.** Joinpoint graph of DTP3 in Jamaica (2012-22).

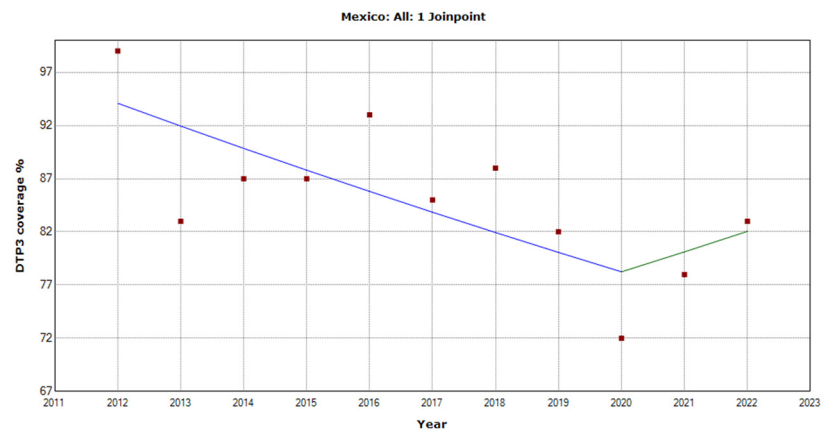

\* Indicates that the Annual Percent Change (APC) is significantly different from zero at the  $\alpha = 0.05$  level  
Final Selected Model: 0 Joinpoints.

**Figure S12.** Joinpoint graph of DTP3 in Mexico. (2012-22).

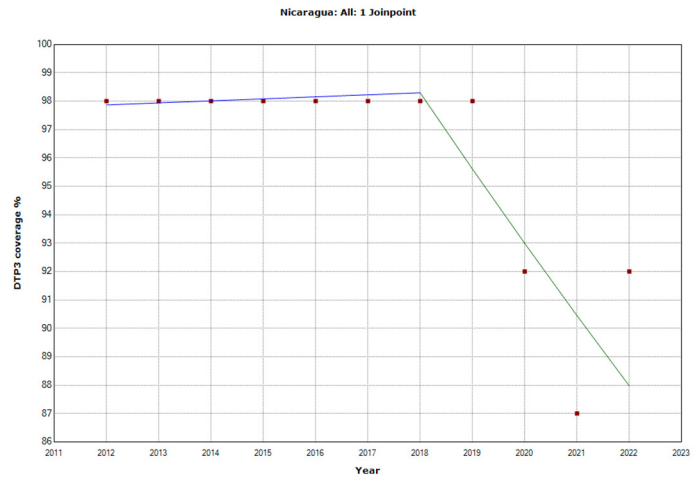

Figure S13. Joinpoint graph of DTP3 in Nicaragua (2012-22).

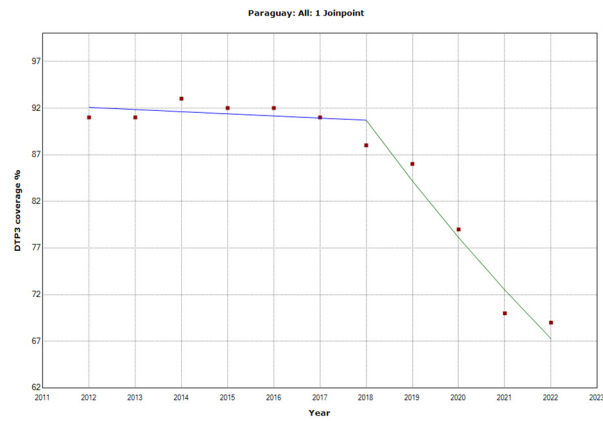

Figure S14. Joinpoint graph of DTP3 in Paraguay (2012-22).

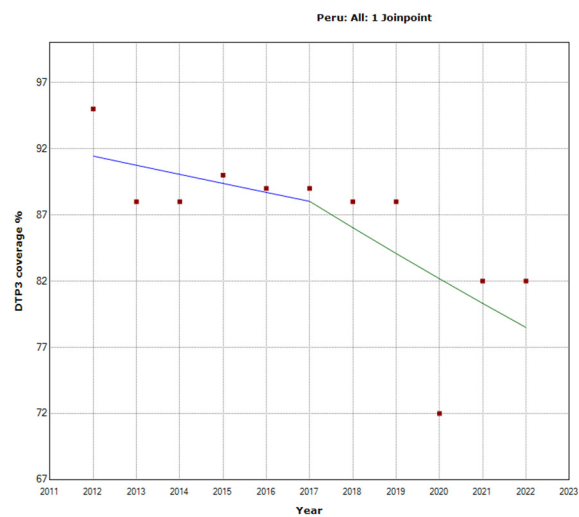

Figure S15. Joinpoint graph of DTP3 in Peru (2012-22).

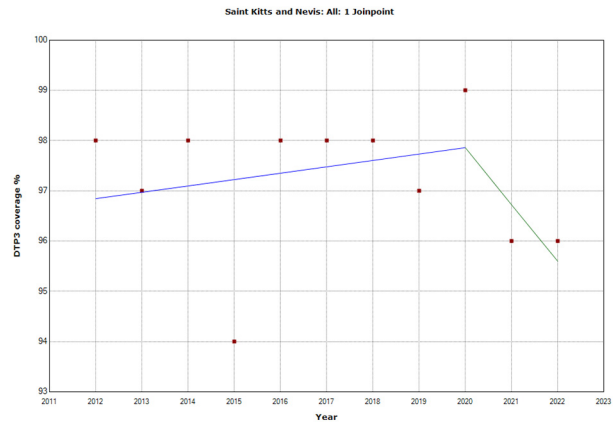

**Figure S16.** Joinpoint graph of DTP3 in Saint Kitts and Nevis (2012-22).

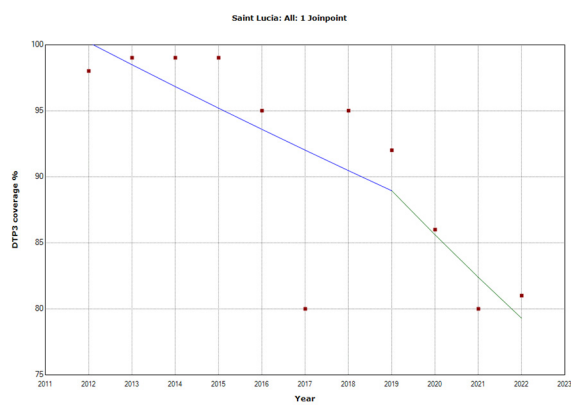

**Figure S17.** Joinpoint graph of DTP3 in Saint Lucia (2012-22).

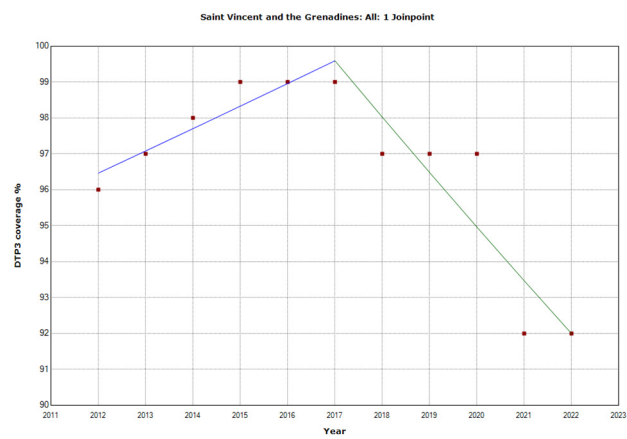

**Figure S18** Joinpoint graph of DTP3 in Saint Vincent and the Grenadines (2012-22).

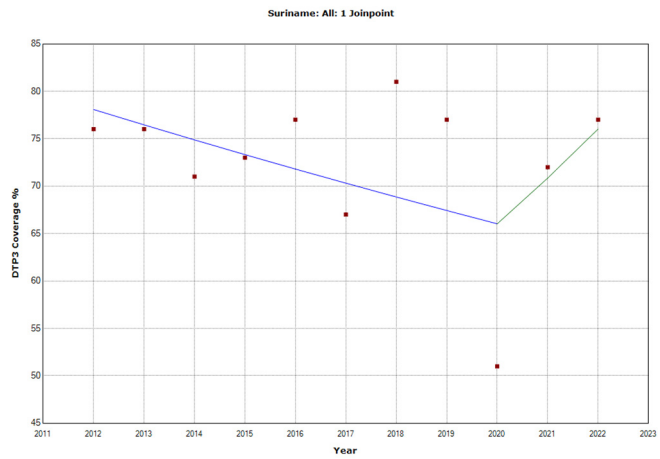

**Figure S19.** Joinpoint graph of DTP3 in Suriname (2012-22).

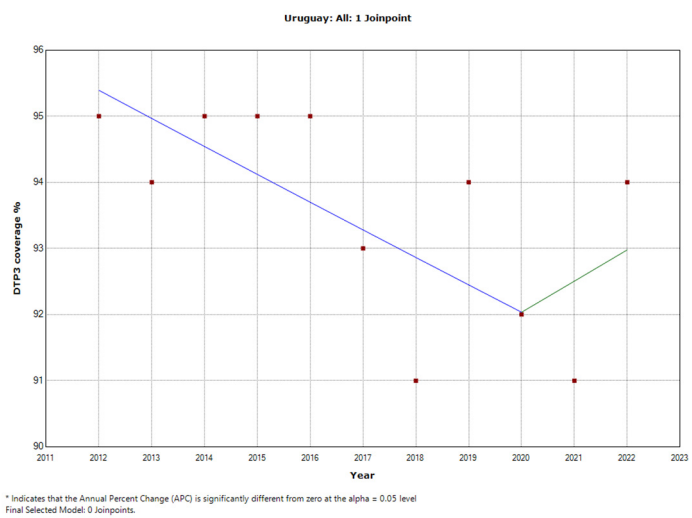

**Figure S20.** Joinpoint graph of DTP3 in Uruguay (2012-22).

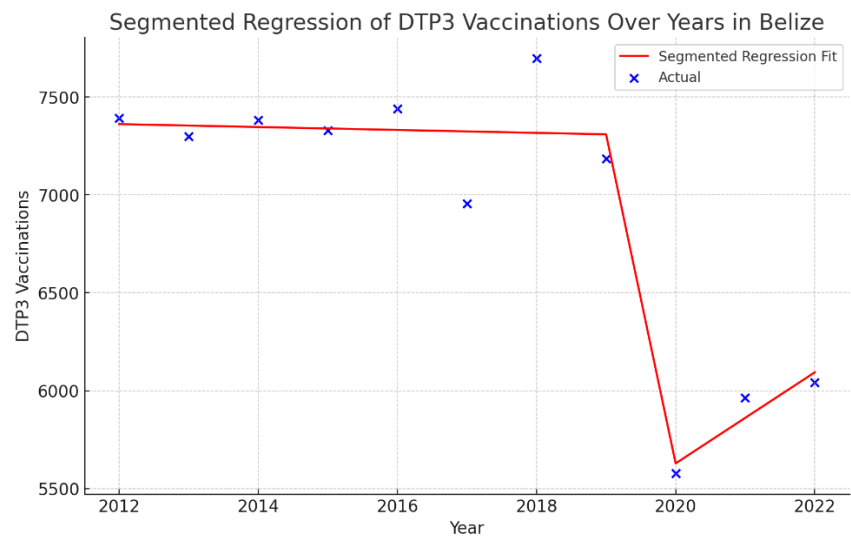

**Figure S21.** Segmented Regression Analysis of DTP3 Vaccination in Belize, representing the actual number of DTP3 vaccinations (in blue) and the fitted values from the segmented regression (in red).

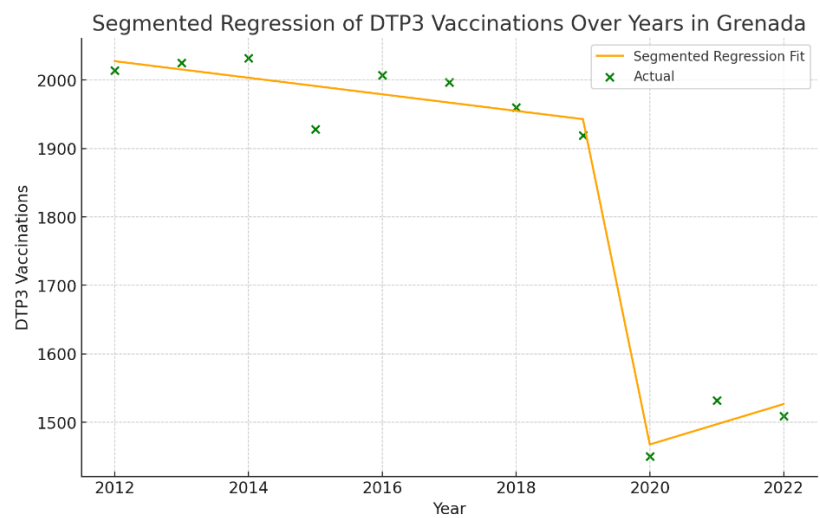

**Figure S22** Segmented Regression Analysis of DTP3 vaccinations in Grenada represents the number of DTP3 vaccinations (in green) and the fitted values from the segmented regression (in orange)



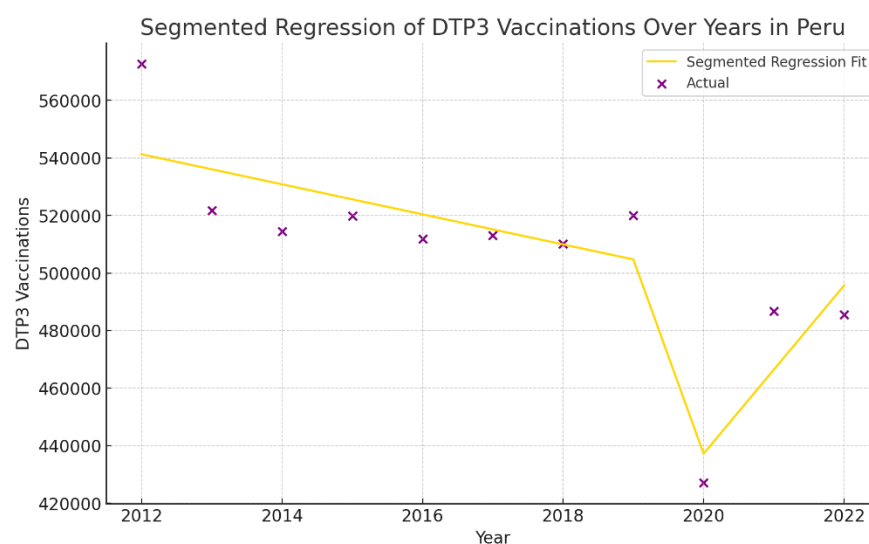

**Figure S23.** Segmented Regression Analysis of DTP3 vaccinations in Peru representing the actual DTP3 vaccination numbers (in purple) and the fitted values from the segmented regression (in gold).

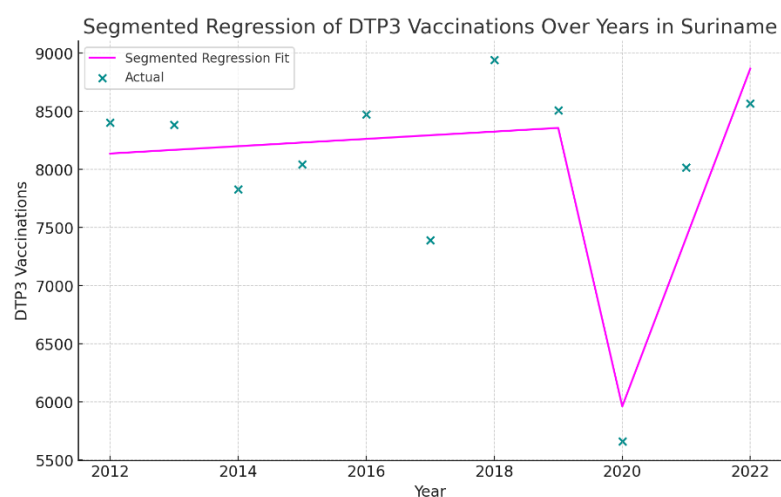

**Figure S24.** Segmented Regression Analysis of DTP3 vaccinations in Suriname representing the actual DTP3 vaccination numbers (in dark cyan) and the fitted values from the segmented regression (in magenta).

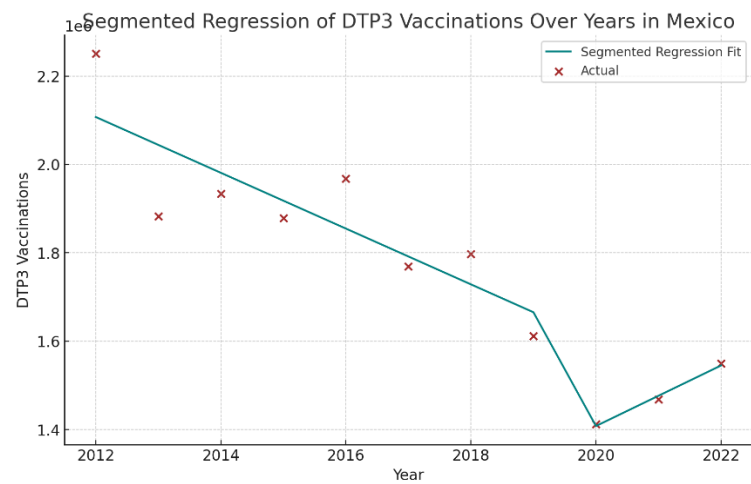

**Figure S25** Segmented regression analysis of DTP3 vaccinations in Mexico representing the actual DTP3 vaccination numbers (in brown) and the predicted values from the segmented regression (in teal).

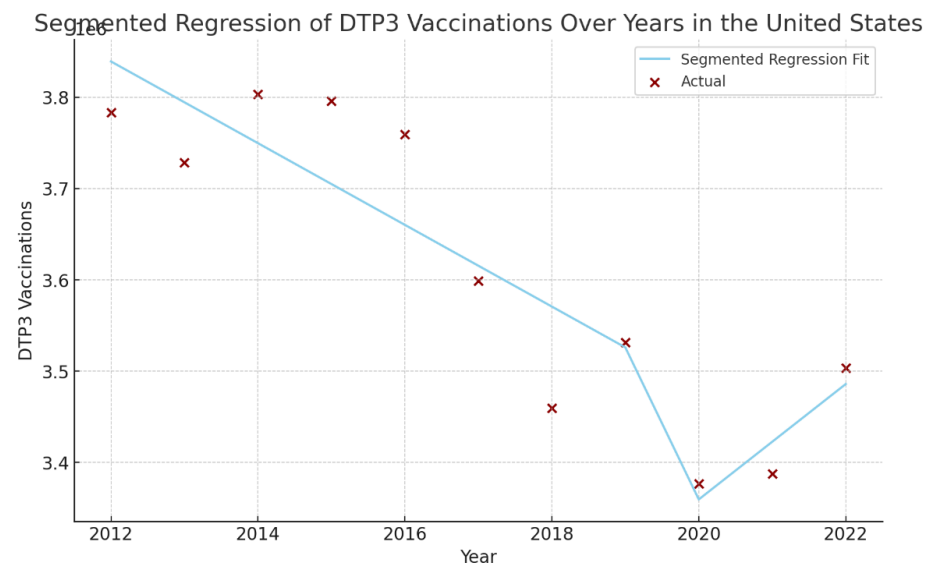

**Figure S26.** Segmented regression analysis of DTP3 vaccinations in the United States representing the actual DTP3 vaccination numbers in (dark red) against the predicted values from the segmented regression (in sky blue).
