# Supplementary material for: Has COVID-19 Affected DTP3 Vaccination in the Americas?
Source: MDPI journal article supplement (doi:10.3390/vaccines12030238), 2024-02-25
Supplement: s1 [file s1]

**Table S1.** Summary Table Displaying Joinpoints close to 2020 and Chi-Square Test and Segmented Regression Analysis.

| Country                          | Joinpoint |             |             | X <sup>2</sup> | Segmented regression |
|----------------------------------|-----------|-------------|-------------|----------------|----------------------|
|                                  | Estimate  | Lower 95%CI | Upper 95%CI | 2019-22        | 2002-22              |
| Antigua and Barbuda              | 2017      | 2014        | 2020        | <0.001         | ns                   |
| Argentina                        |           |             |             | <0.001         | ns                   |
| Bahamas                          | 2020      | 2014        | 2020        | ns             | ns                   |
| Barbados                         |           |             |             | ns             | ns                   |
| Belize                           | 2019      | 2014        | 2020        | 0.003          | <0.05                |
| Bolivia (Plurinational State of) |           |             |             | <0.001         | ns                   |
| Brazil                           |           |             |             | <0.001         | ns                   |
| Canada                           | 2018      | 2016        | 2020        | ns             | <0.05                |
| Chile                            |           |             |             | ns             | ns                   |
| Colombia                         | 2019      | 2017        | 2020        | <0.001         | ns                   |
| Costa Rica                       | 2017      | 2014        | 2020        | ns             | ns                   |
| Cuba                             |           |             |             | ns             | ns                   |
| Dominica                         | 2020      | 2014        | 2020        | ns             | ns                   |
| Dominican Republic               |           |             |             | ns             | ns                   |
| Ecuador                          | 2018      | 2014        | 2020        | <0.001         | ns                   |
| El Salvador                      |           |             |             | <0.001         | ns                   |
| Grenada                          | 2018      | 2014        | 2020        | ns             | <0.05                |
| Guatemala                        |           |             |             | <0.001         |                      |
| Guyana                           |           |             |             | ns             | ns                   |
| Haiti                            | 2017      | 2014        | 2020        | ns             | ns                   |
| Honduras                         |           |             |             | <0.001         | ns                   |
| Jamaica                          | 2019      | 2014        | 2020        | ns             | ns                   |
| Mexico                           | 2020      | 2014        | 2020        | <0.001         | ns                   |
| Nicaragua                        | 2018      | 2016        | 2020        | <0.001         | ns                   |
| Panama                           |           |             |             | ns             | ns                   |
| Paraguay                         | 2018      | 2016        | 2019        | <0.001         | ns                   |
| Peru                             | 2017      | 2014        | 2020        | <0.001         | <0.05                |
| Saint Kitts and Nevis            | 2020      | 2014        | 2020        | ns             | ns                   |
| Saint Lucia                      | 2019      | 2014        | 2020        | ns             | ns                   |
| Saint Vincent and the Grenadines | 2017      | 2014        | 2020        | ns             | ns                   |
| Suriname                         | 2020      | 2014        | 2020        | ns             | <0.05                |
| Trinidad and Tobago              |           |             |             | ns             | ns                   |
| Uruguay                          | 2020      | 2014        | 2020        | ns             | ns                   |
| United States                    |           |             |             | ns             | ns                   |
| Venezuela                        |           |             |             | <0.001         | ns                   |

ns= No Significant
